# Supplementary material for: Implementing spirometry and fractional exhaled nitric oxide testing in childhood asthma management in UK primary care: an observational study to examine training and implementation cost and impact on patient’s health use and outcome
Source: PubMed Central journal article supplement — Arch Dis Child. 2021 Jul 9;107(1):21–5. doi: 10.1136/archdischild-2020-319310 (PMC8685621; doi:10.1136/archdischild-2020-319310), 2021-07-09
Supplement: archdischild-2020-319310supp001.pdf [file archdischild-2020-319310supp001.pdf]

**Appendix 1 Standardized unit costs for clinical staff involved**

|                                                | Unit costs (£) | Unit         | Source                                                        |
|------------------------------------------------|----------------|--------------|---------------------------------------------------------------|
| <b>Trainees</b>                                |                |              |                                                               |
| Health Care Assistant                          | 23             | Working hour | NHS band 2 (PSSRU 2017)                                       |
| Practice nurse                                 | 44             | working hour | NHS band 6 (PSSRU 2017)                                       |
| Nurse practitioner                             | 53             | working hour | NHS band 7 (PSSRU 2017)                                       |
| <b>Trainers</b>                                |                |              |                                                               |
| Specialist Nurse Lead (Help develop training)  | 62             | Working hour | NHS band 8a (PSSRU 2017)                                      |
| Research nurse (provide training)              | 53             | Working hour | NHS band 7 (PSSRU 2017)                                       |
| Respiratory clinical fellow (provide training) | 52             | Working hour | NHS hospital-based registrar (40 hours per week) (PSSRU 2017) |
| Respiratory consultant (Help develop training) | 106            | Working hour | NHS hospital-based consultant (PSSRU 2017)                    |
| <b>Others</b>                                  |                |              |                                                               |
| GP                                             | 113            | Working hour | GP time without qualification (PSSRU 2017)                    |

**Appendix 2 Clinical staff time spent on the development of the teaching and training package**

|                                  | Unit costs (£/hour) | Total hours on development of training package | Total costs (£) |
|----------------------------------|---------------------|------------------------------------------------|-----------------|
| Specialist Nurse Lead(KM)        | 62                  | 4                                              | 248             |
| Research nurse                   | 53                  | 8                                              | 424             |
| Respiratory clinical fellow (DL) | 52                  | 54                                             | 2,808           |
| Respiratory consultant (EL)      | 106                 | 8                                              | 848             |
| Total                            | n/a                 | 74                                             | 4,328           |

**Appendix 3 Cost of face to face teaching**

|                             | Total number | Total hours | Unit cost/hour (£) | Total cost (£) |
|-----------------------------|--------------|-------------|--------------------|----------------|
| <b>Trainees</b>             |              |             |                    |                |
| Health Care Assistant       | 12           | 24          | 23                 | 552            |
| Practice nurse              | 9            | 18          | 44                 | 792            |
| Nurse practitioner          | 6            | 12          | 53                 | 636            |
| <b>Trainers</b>             |              |             |                    |                |
| Research nurse              | 1            | 10          | 53                 | 530            |
| Respiratory clinical fellow | 1            | 15          | 52                 | 780            |
| Total                       | 29           | 79          | n/a                | 3,290          |

**Appendix 4 Total number of testings observed, supervised performed and interpreted and associated costs for practical training**

| <b>Trainees</b>          | <b>Spirometry &amp; FeNO observed*</b> | <b>Supervised spirometry &amp; FeNO performed*</b> | <b>Supervised spirometry interpretation**</b> | <b>Supervised FeNO interpretation**</b> | <b>Total time for practical training (hours)</b> | <b>Unit cost (£ per hour)</b> | <b>Total cost (£)</b> |
|--------------------------|----------------------------------------|----------------------------------------------------|-----------------------------------------------|-----------------------------------------|--------------------------------------------------|-------------------------------|-----------------------|
| Health Care assistant    | 84                                     | 182                                                | 0                                             | 0                                       | 88.7(88.7+0)                                     | 23                            | 2,040                 |
| Practice nurse           | 29                                     | 1                                                  | 155                                           | 152                                     | 35.6(10 +25.6)                                   | 44                            | 1,566                 |
| Nurse practitioner       | 39                                     | 59                                                 | 178                                           | 175                                     | 62.1<br>(32.7+29.4 )                             | 53                            | 3,291                 |
| <b>Total</b>             | 152                                    | 242                                                | 333                                           | 327                                     | 537                                              | n/a                           | 6,898                 |
| <b>Trainers</b>          | <b>Clinics</b>                         | <b>Total clinics' time (hours)</b>                 | <b>Average Unit cost (£ per hour)</b>         | <b>Total cost (£)</b>                   |                                                  |                               |                       |
| Research nurse or fellow | 147                                    | 441                                                | 53                                            | 23,153                                  |                                                  |                               |                       |

\*: 20 minutes were allocated to observe or perform Spirometry and FeNO test.

\*\*: 5 minutes were allocated to spirometry or FeNO result interpretation.

**Appendix 5 Total number of trainees' cost for implementing and delivering test-guided asthma review**

| <b>Trainees</b><br>(clinical record) | Total asthma reviews delivered | Total time for implementation (hour) | Unit costs (£/hour) | Total costs (£) |
|--------------------------------------|--------------------------------|--------------------------------------|---------------------|-----------------|
| Health Care assistant                | 0                              | 72                                   | 23                  | 1656            |
| Practice nurse                       | 230                            | 77                                   | 44                  | 3,373           |
| Nurse practitioner                   | 365                            | 122                                  | 53                  | 6,450           |
| Total                                | 612                            | 295                                  | n/a                 | 11,479          |
